# Supplementary material for: A new squaraine-triazine based covalent organic polymer as an electrode material with long life and high performance for supercapacitors
Source: Royal Society of Chemistry journal article supplement (doi:10.1039/d0nj03551c), 2020-12-09
Supplement: d0nj03551c1.pdf [file d0nj03551c1.pdf]

## Supporting information

# A new squaraine-triazine based covalent organic polymers as electrode material with long life and high performance for supercapacitor

Rui Xue\*, Hao Gou, Li Zhang, Yinsheng Liu, Honghong Rao, Guohu Zhao\*

College of Chemistry and Chemical Engineering, Lanzhou City University,

Lanzhou 730070, Gansu, P. R. China;

Provincial Key Laboratory of Gansu Higher Education for City Environmental Pollution Control,

Lanzhou 730070, Gansu, P. R. China.

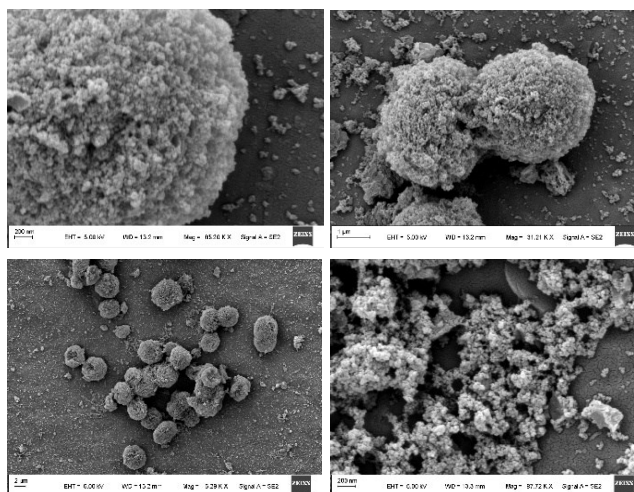

**Figure S1** SEM images of ST-1

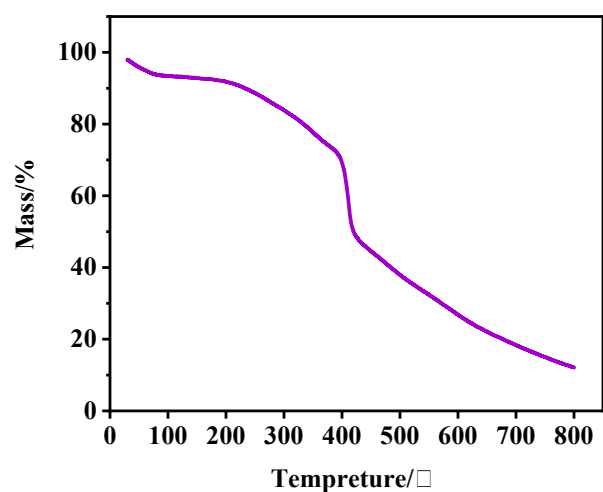

Figure S2 TG curve of ST-1

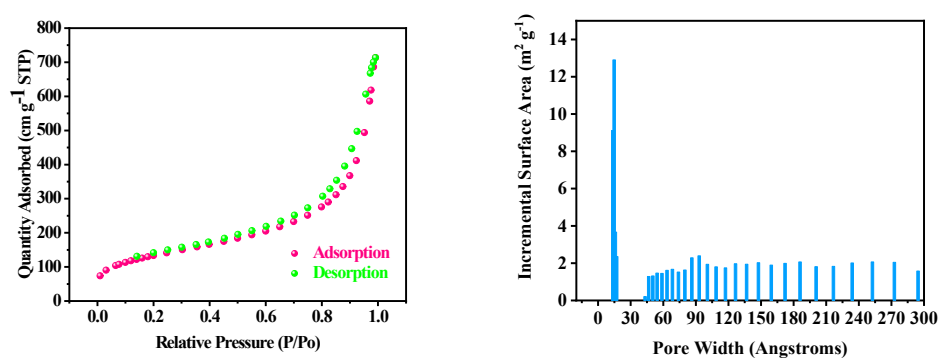

Figure S3 (a) Pore size distribution of ST-1. (b)  $N_2$  adsorption and desorption isotherm.

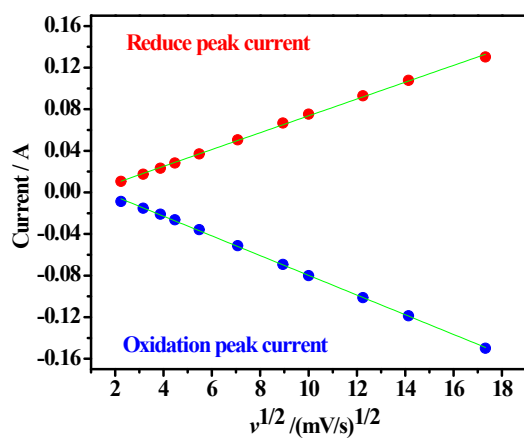

Figure S4 The linear relationship between redox peak current and the square root of scan rate ( $v$ ) of ST-1 within the potential window of 0 V ~ 0.5 V.
